# Supplementary material
Source: PubMed Central journal article supplement (PMC3807063)
Supplement: supp_113.206573_JPET_206573_supp1.pdf [file supp_113.206573_JPET_206573_supp1.pdf]

## The Journal of Pharmacology and Experimental Therapeutics

Effects of intrathecal SNC80, a delta receptor ligand, on nociceptive threshold and dorsal horn substance P release – JPET/206573

Milad Kouchek, Toshifumi Takasusuki, Tetsuji Terashima, Tony Yaksh, Qinghao Xu

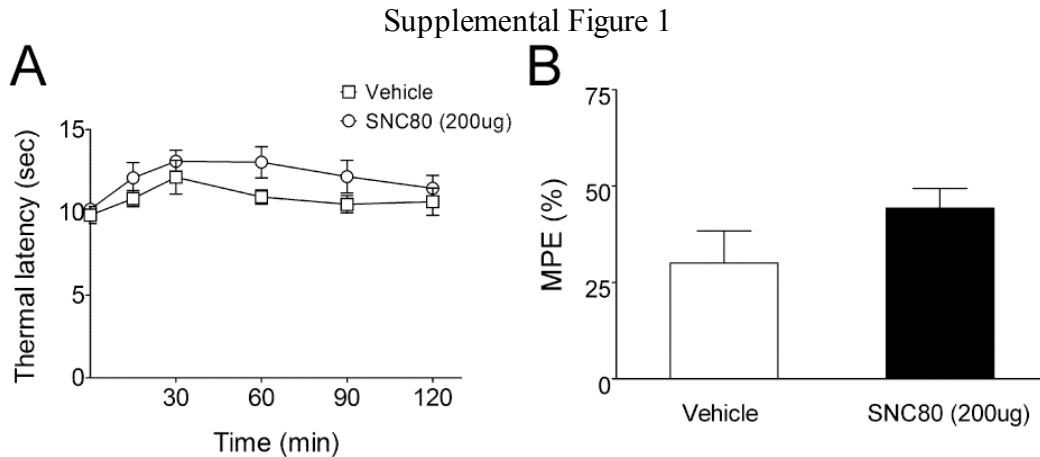

Supplemental Figure 1. Effects of intrathecal SNC80 on acute thermal escape latency. (A) Thermal latency in seconds plotted as a function of time after intrathecal SNC80 (200 $\mu$ g) or vehicle. (B) Histogram represents the mean % maximum possible effect (%MPE) of vehicle and SNC80 (200 $\mu$ g). 200 $\mu$ g of SNC80 did not change the %MPE. Data are presented as mean  $\pm$  S.E.M. n=6.
