# Supplementary material
Source: PubMed Central journal article supplement (PMC3807063)
Supplement: supp_113.206573_JPET_206573_supp2.pdf [file supp_113.206573_JPET_206573_supp2.pdf]

**The Journal of Pharmacology and Experimental Therapeutics**

Effects of intrathecal SNC80, a delta receptor ligand, on nociceptive threshold and dorsal horn substance P release – JPET/206573

Milad Kouчек, Toshifumi Takasusuki, Tetsuji Terashima, Tony Yaksh, Qinghao Xu

Supplemental Figure 2

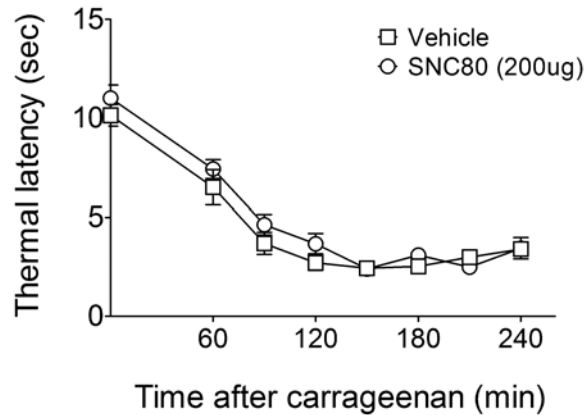

Supplemental Figure 2. Effects of intrathecal SNC80 on  $\gamma$ -carrageenan-induced thermal hyperalgesia. Thermal latency in seconds plotted as a function of time after  $\gamma$ -carrageenan. Vehicle or SNC80 (200 $\mu$ g) were administered intrathecally at time 60 min. Data are presented as mean  $\pm$  S.E.M., n=5-7.
