# Supplementary material
Source: PubMed Central journal article supplement (PMC3807063)
Supplement: supp_113.206573_JPET_206573_supp3.pdf [file supp_113.206573_JPET_206573_supp3.pdf]

**The Journal of Pharmacology and Experimental Therapeutics**

Effects of intrathecal SNC80, a delta receptor ligand, on nociceptive threshold and dorsal horn substance P release – JPET/206573

Milad Kouchek, Toshifumi Takasusuki, Tetsuji Terashima, Tony Yaksh, Qinghao Xu

Supplemental Figure 3

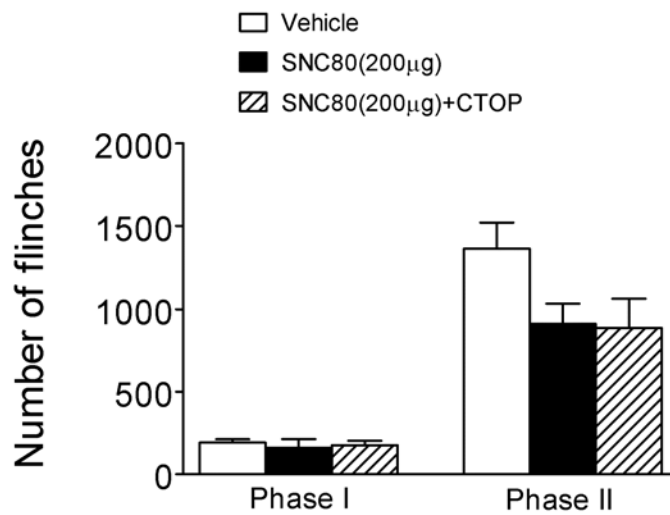

Supplemental Figure 3. The effects of CTOP on SNC80 (200µg)-mediated antinociception following formalin. Rats were treated with CTOP (10µg, IT), followed by IT SNC80 (20 min after CTOP) and intraplantar formalin (10 min after SNC80). Cumulative flinches following intraplantar formalin in phase 1 (1-9min) and phase 2 (10-60min) were shown. Data are presented as mean ± S.E.M. n=3-5.
